# Supplementary material
Source: PubMed Central journal article supplement (PMC7685881)
Supplement: JCM.01729-20-s0002.pdf [file JCM.01729-20-s0002.pdf]

Table S2. Mayo Clinic Laboratories cerebrospinal fluid shotgun metagenomic sequencing results

| Sample | Age | Sex | Result                       | Additional Reporting Comments                                                                                                     |
|--------|-----|-----|------------------------------|-----------------------------------------------------------------------------------------------------------------------------------|
| MCL-1  | 76  | F   | West Nile virus              |                                                                                                                                   |
| MCL-2  | 18  | M   | <i>Toxoplasma gondii</i>     |                                                                                                                                   |
| MCL-3  | 45  | M   | <i>Streptococcus</i> species | Thermophilic streptococci of dairy origin with <i>Lactobacillus</i> and <i>Morganella</i> below the cut-off. Likely contamination |
| MCL-4  | 85  | F   | Negative                     | Limited analysis of RNA viruses due to QC failure with external RNA control                                                       |
| MCL-5  | 57  | F   | Negative                     |                                                                                                                                   |
| MCL-6  | 33  | M   | Negative                     |                                                                                                                                   |
| MCL-7  | 51  | M   | Negative                     |                                                                                                                                   |
| MCL-8  | 53  | F   | Negative                     |                                                                                                                                   |
| MCL-9  | 31  | M   | Negative                     |                                                                                                                                   |
| MCL-10 | 56  | F   | Negative                     |                                                                                                                                   |
| MCL-11 | 40  | M   | Negative                     |                                                                                                                                   |
| MCL-12 | 61  | F   | Negative                     |                                                                                                                                   |
| MCL-13 | 49  | F   | Negative                     |                                                                                                                                   |
| MCL-14 | 11  | M   | Negative                     |                                                                                                                                   |
| MCL-15 | 62  | F   | Negative                     |                                                                                                                                   |
| MCL-16 | 19  | F   | Negative                     |                                                                                                                                   |
| MCL-17 | 29  | F   | Negative                     |                                                                                                                                   |
| MCL-18 | 70  | F   | Negative                     |                                                                                                                                   |
| MCL-19 | 31  | M   | Negative                     |                                                                                                                                   |
| MCL-20 | 35  | M   | Negative                     |                                                                                                                                   |
| MCL-21 | 20  | M   | Negative                     |                                                                                                                                   |
| MCL-22 | 54  | F   | Negative                     |                                                                                                                                   |
| MCL-23 | 69  | M   | Negative                     | Sample contains high DNA background: there is decreased sensitivity of detection of DNA viruses, bacteria, fungi, and parasites   |
| MCL-24 | 54  | F   | Negative                     |                                                                                                                                   |
| MCL-25 | 54  | F   | Negative                     | Sample contains high DNA background: there is decreased sensitivity of detection of DNA viruses, bacteria, fungi, and parasites   |
| MCL-26 | 57  | F   | Negative                     |                                                                                                                                   |
| MCL-27 | 25  | F   | Negative                     | Potential limited ability to detect RNA viruses due to insufficient read depth                                                    |
